# Supplementary figures and images for: Electrochemical synthesis of 7-membered carbocycles through cascade 5-exo-trig/7-endo-trig radical cyclization
Source: Royal Society of Chemistry journal article supplement (doi:10.1039/c8qo00803e), 2018-01-01

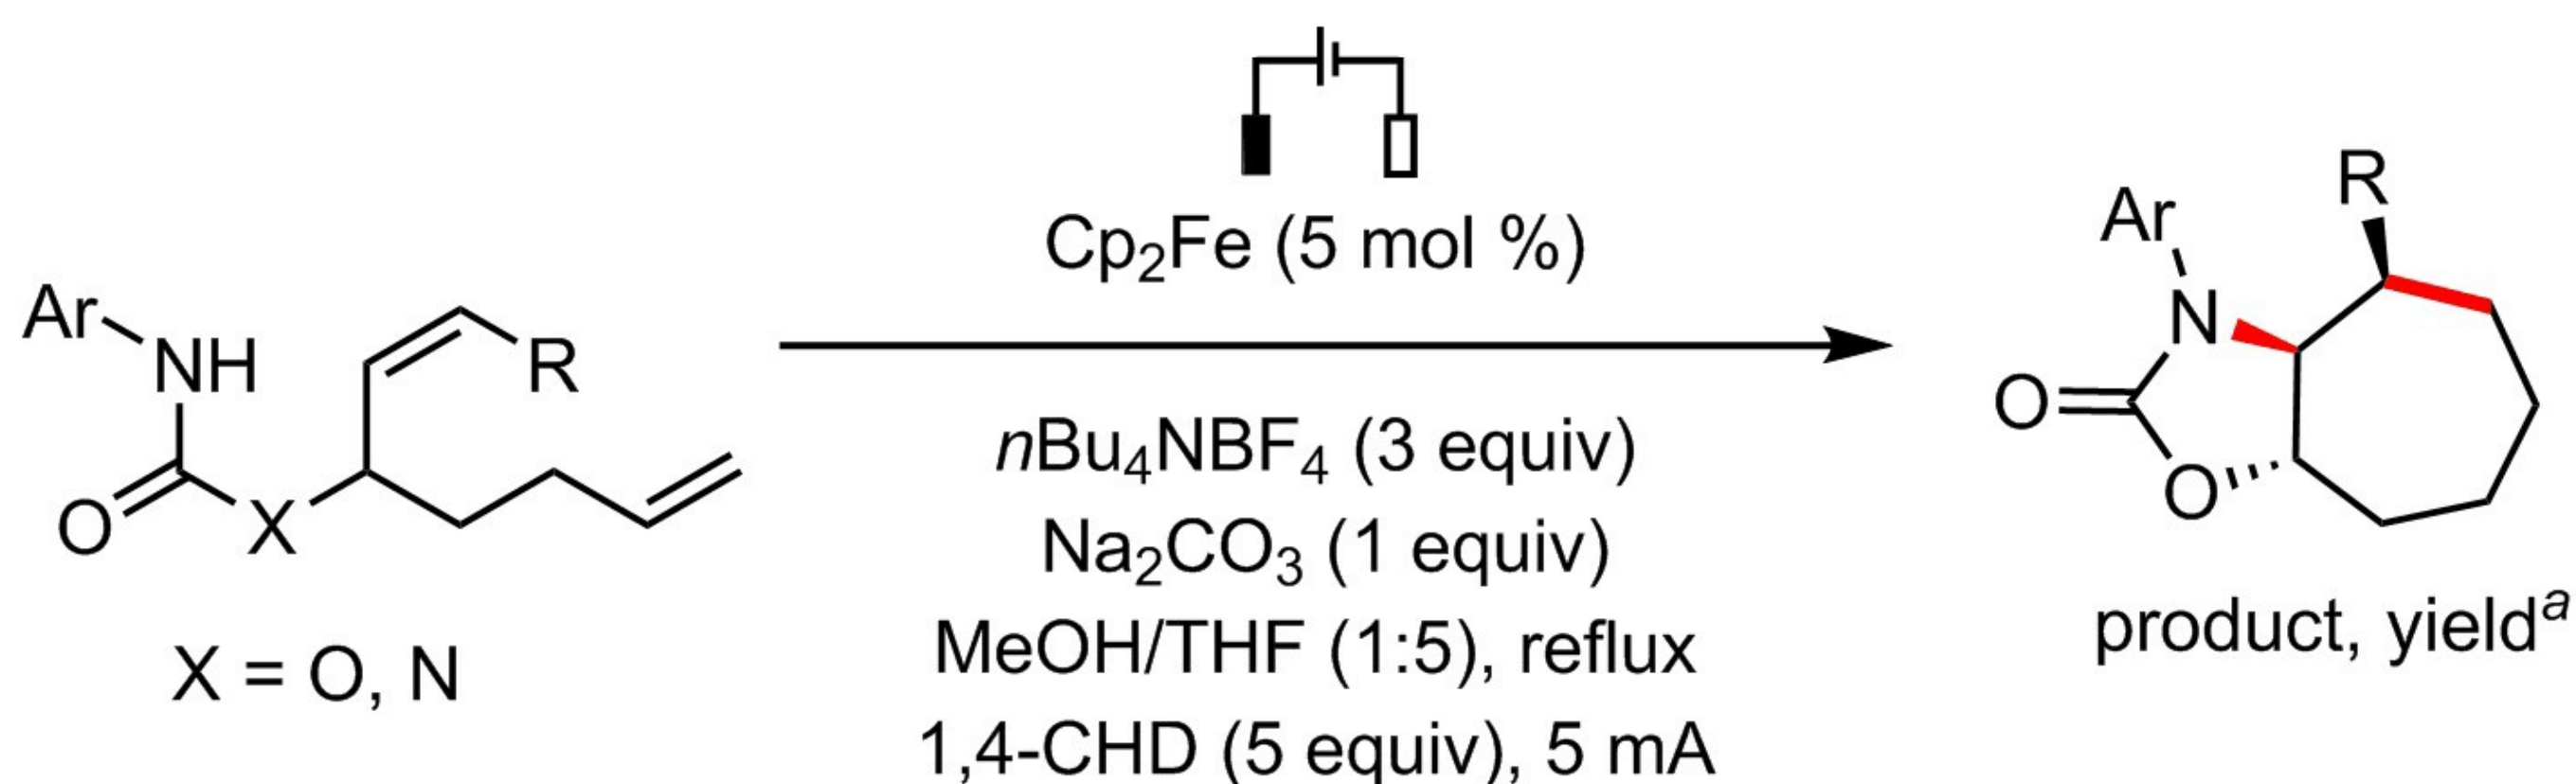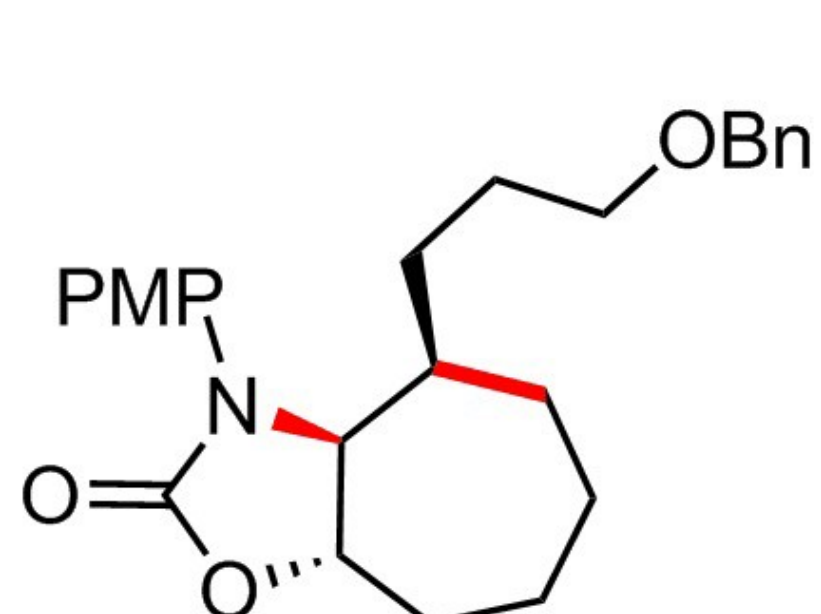

**4**, 52%

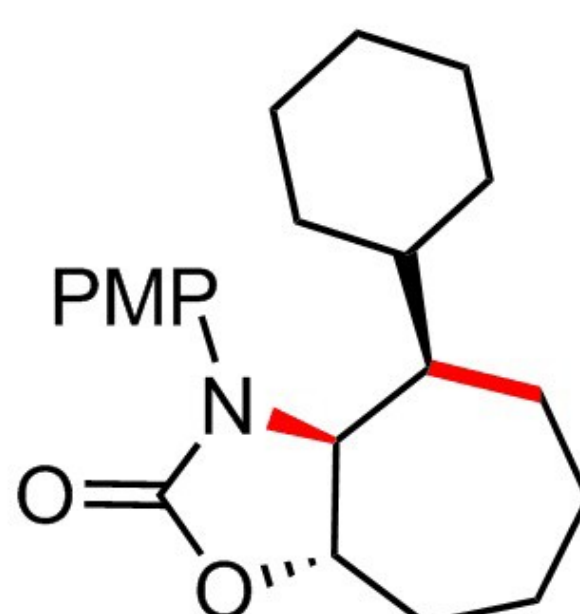

**5**, 47%

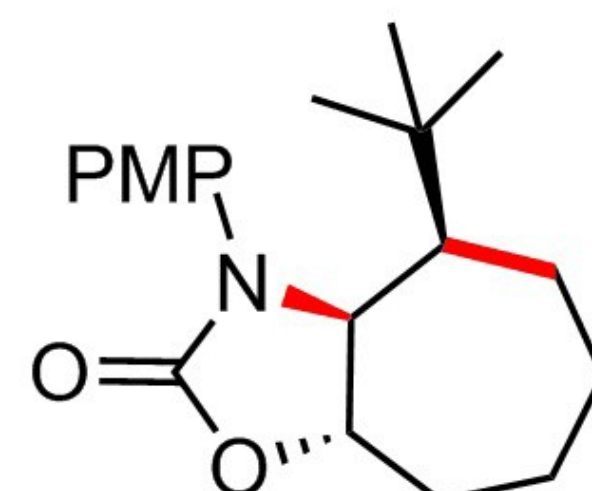

**6**, 0%

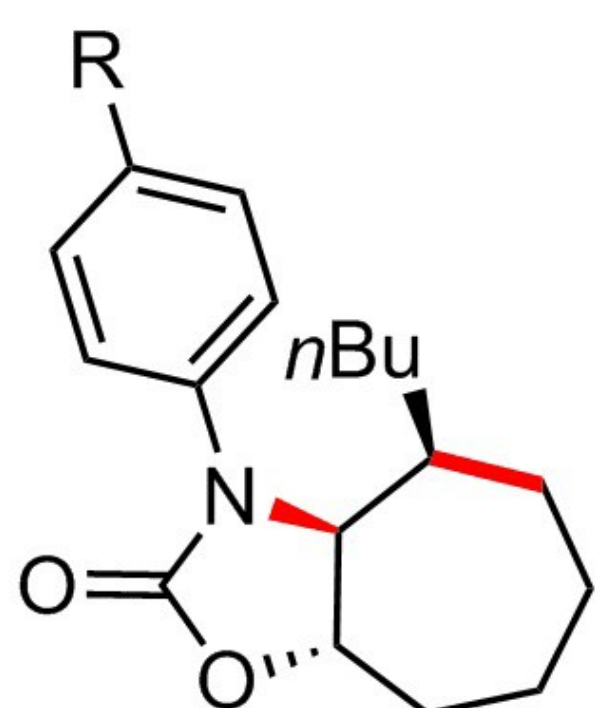

**7**, R = H, 75%

**8**, R = Me, 64%

**9**, R = F, 58%

**10**, R = Cl, 71%

**11**, R = Br, 67%

**12**, R = CF<sub>3</sub>, 69%

**13**, R = CN, 62%

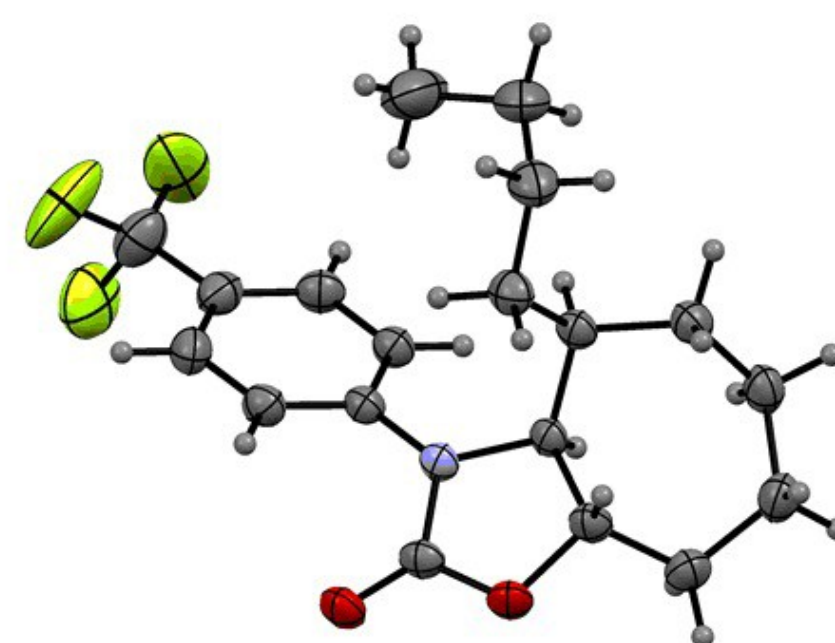

X-ray (**12**)  
[CCDC 1823050]

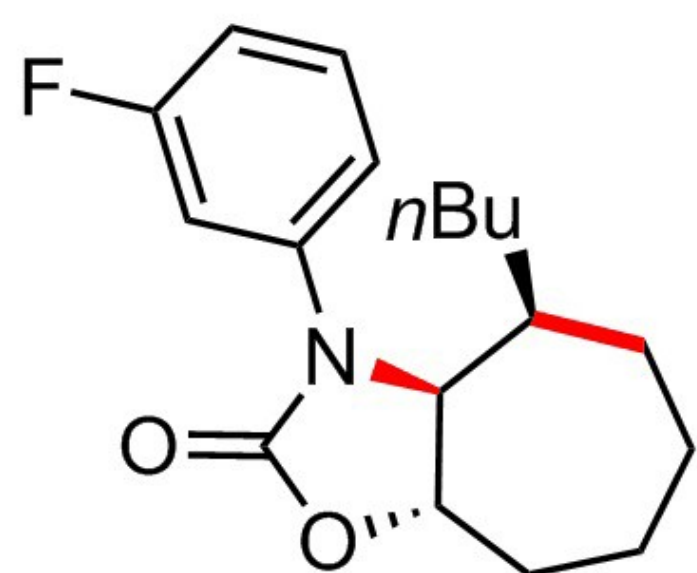

**14**, 62%

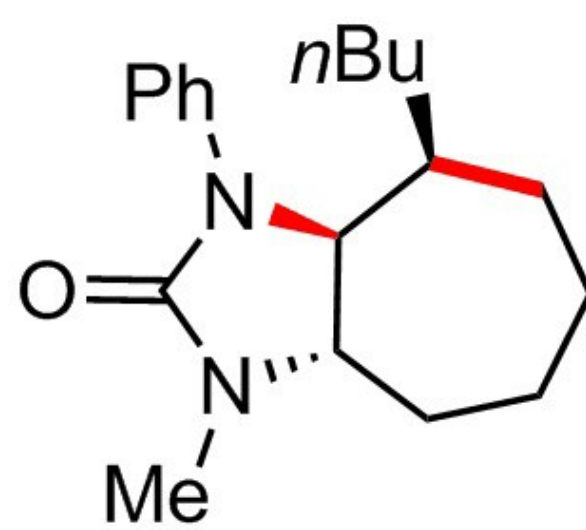

**15**, 40%

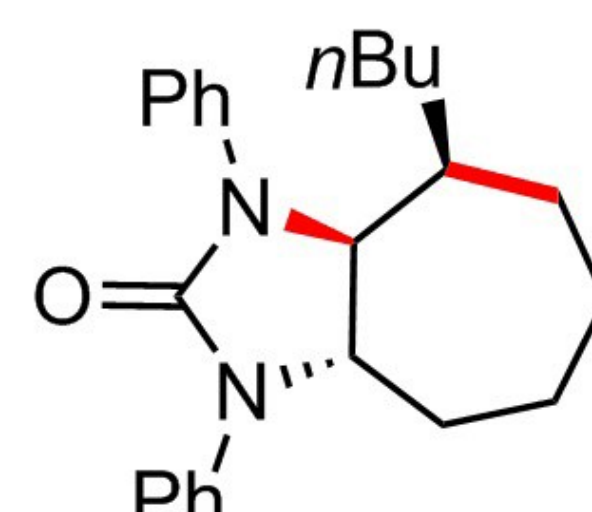

**16**, 58%

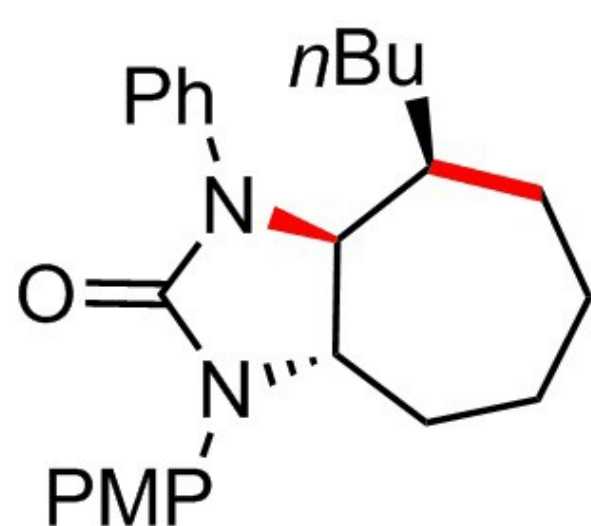

**17**, 52%

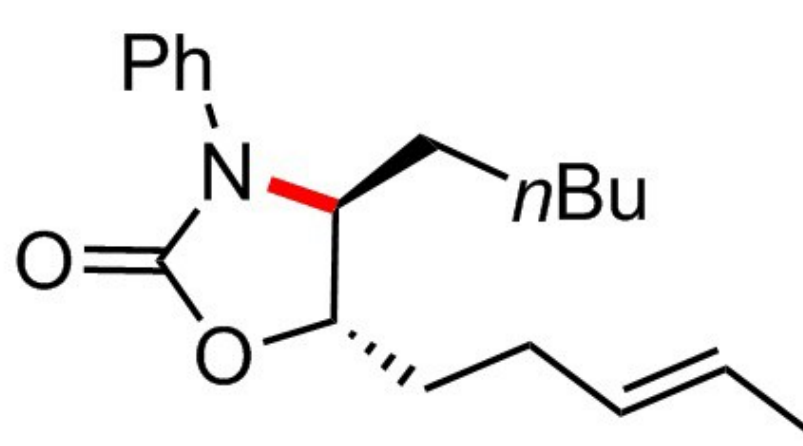

**18**, 62%

Supplement: c8qo00803e2.pdf [file c8qo00803e2.pdf]

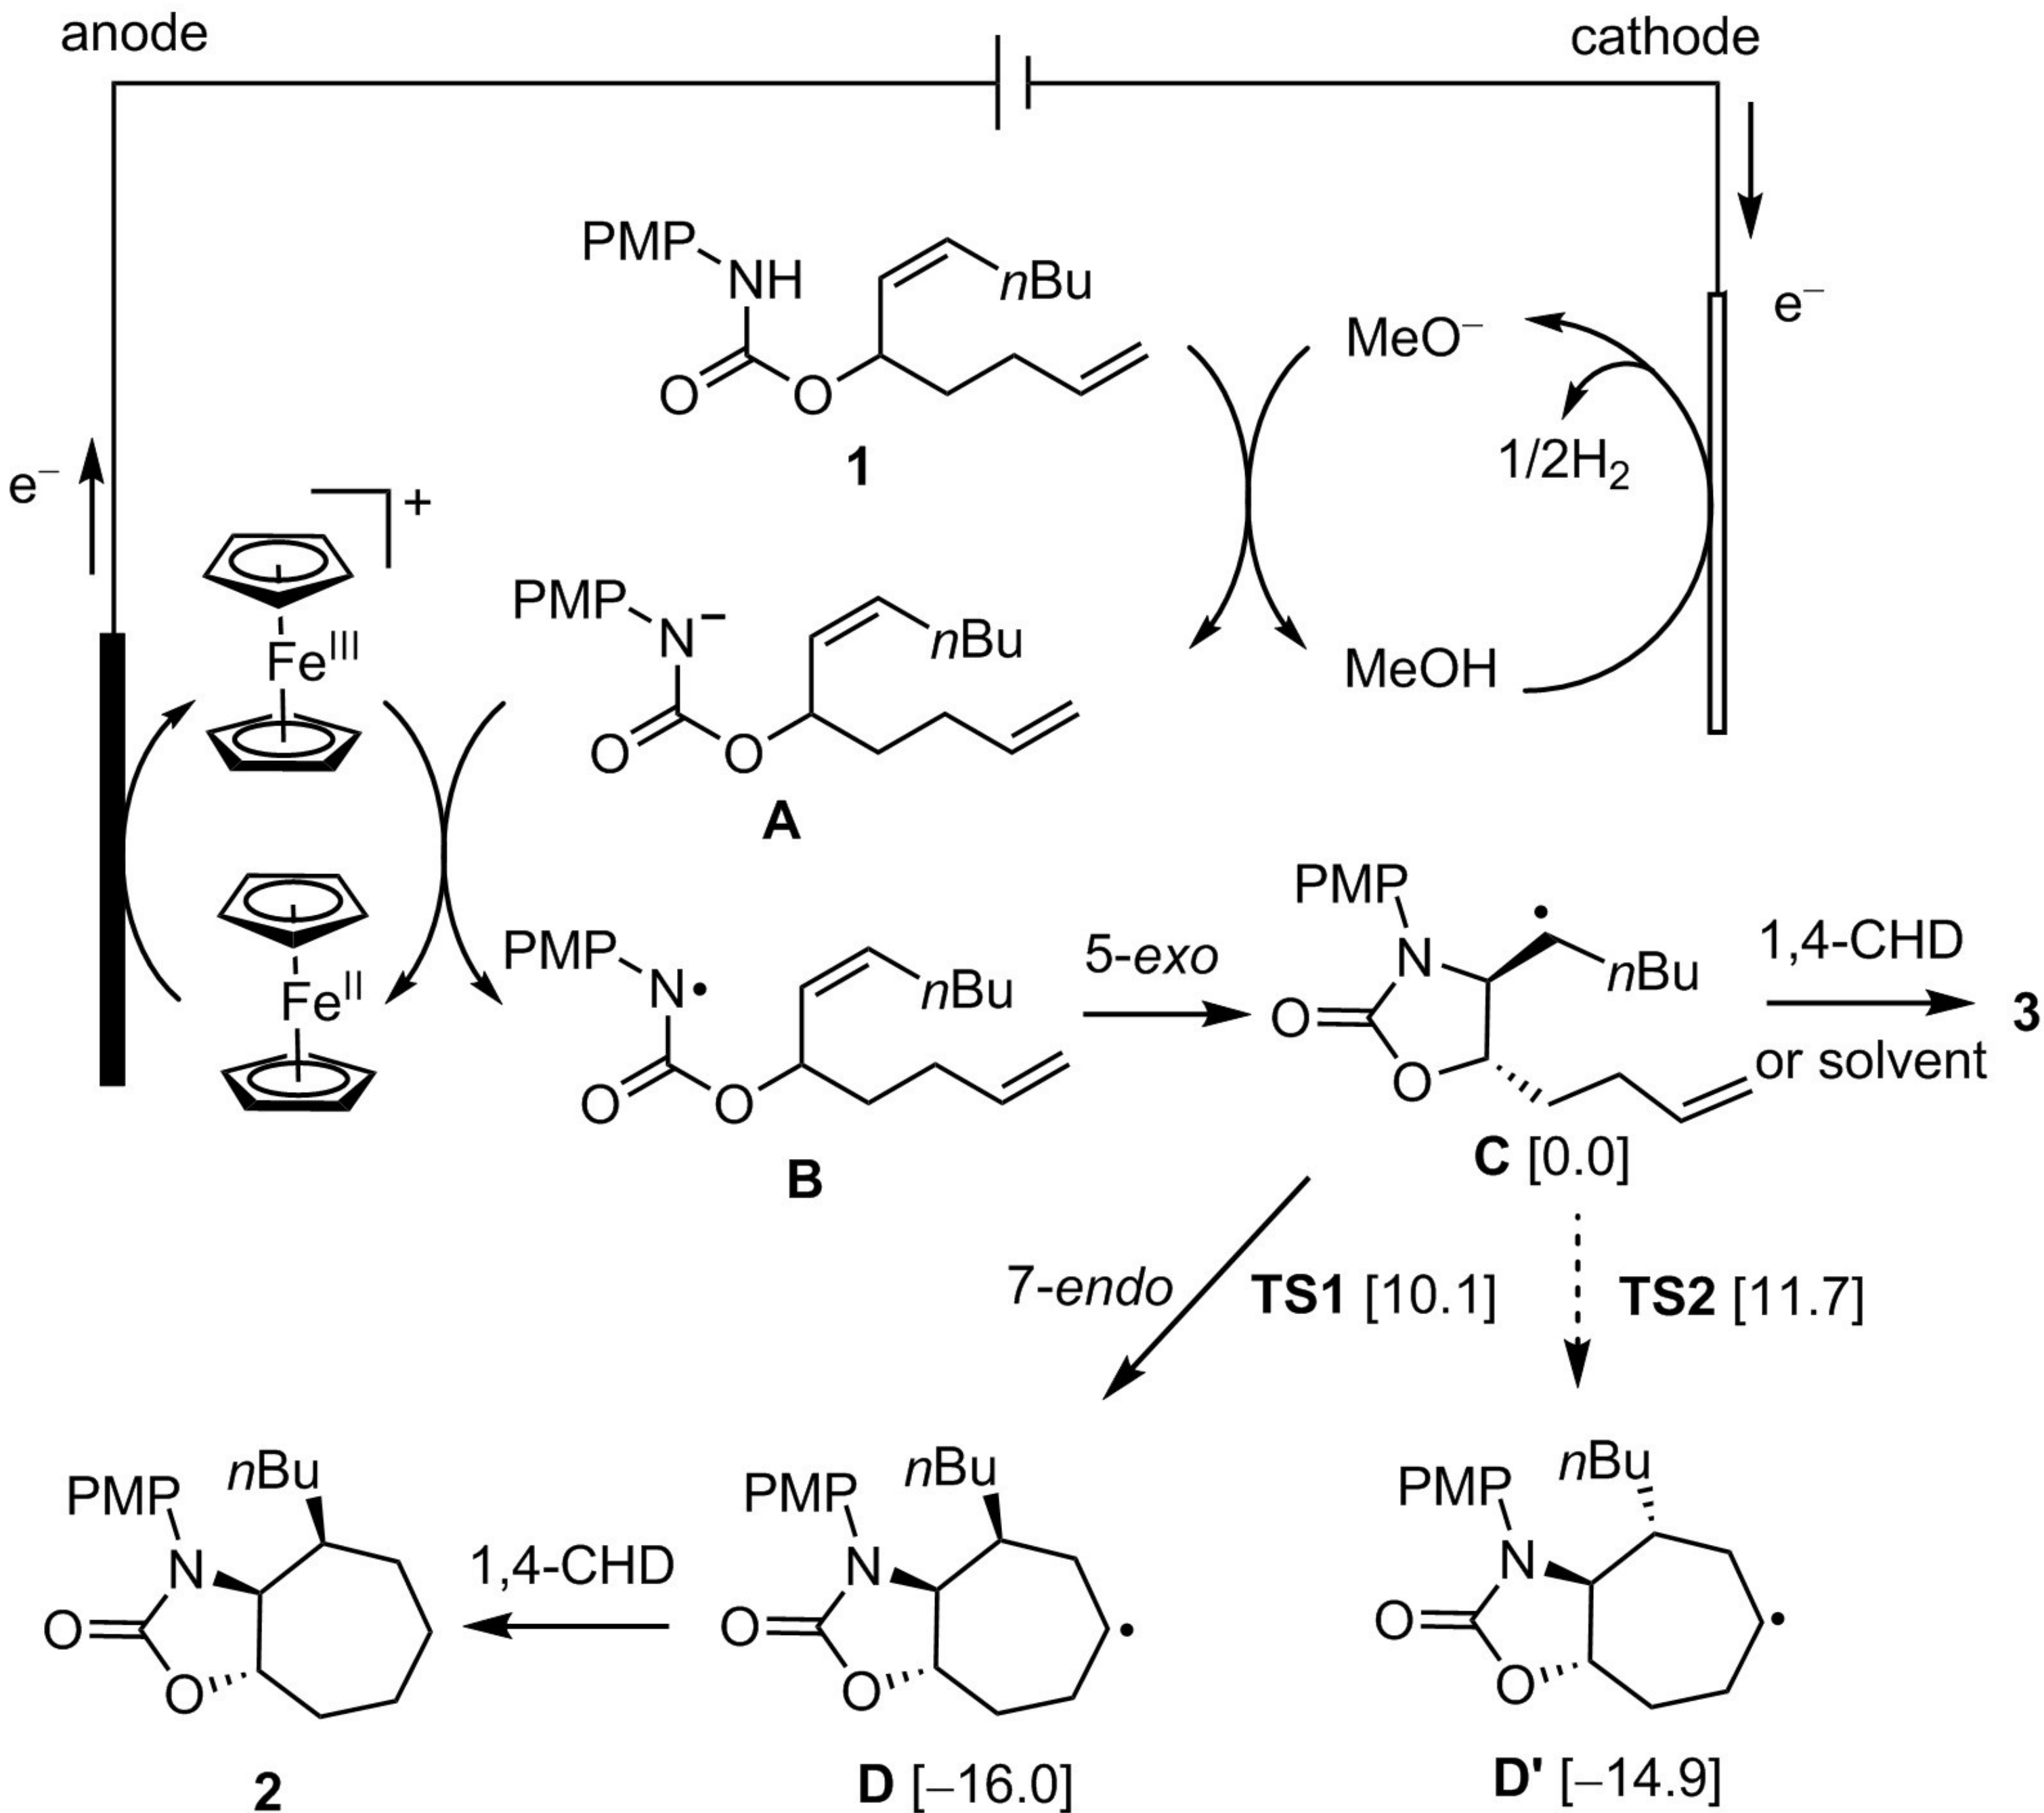

Supplement: c8qo00803e3.pdf [file c8qo00803e3.pdf]
